# Supplementary material
Source: HighWire-hosted journal article supplement (https://svn.smart01.highwire.org/content/svn-2018-000188)
Supplement: inline-supplementary-material-1 [file inline-supplementary-material-1.pdf]

**Supplementary table 1 Study Follow Chart**

|                                        | Screening and<br>patient assignment<br>visit 1<br>0 day | Visit 2<br>24 hours<br>±3hours | Visit 3<br>7 days<br>±2days<br>or at discharge | Visit 4<br>90 days<br>±7days |
|----------------------------------------|---------------------------------------------------------|--------------------------------|------------------------------------------------|------------------------------|
| Signing the informed consent form      | X                                                       |                                |                                                |                              |
| Demographic data                       | X                                                       |                                |                                                |                              |
| Inclusion and exclusion criteria       | X                                                       |                                |                                                |                              |
| Medical history                        | X                                                       |                                |                                                |                              |
| Concomitant medication                 | X                                                       |                                | X                                              | X                            |
| Imaging study (NCCT/CTA/CTP or MR/MRA) | X                                                       | X                              |                                                |                              |
| NIHSS                                  | X                                                       | X                              | X                                              | X                            |
| Lab blood test                         | X                                                       |                                |                                                |                              |
| mRS                                    | X                                                       |                                |                                                | X                            |
| EQ-5D                                  |                                                         |                                |                                                | X                            |
| BI                                     |                                                         |                                |                                                | X                            |
| Medical therapy list                   |                                                         | X                              | X                                              |                              |
| Adverse event record                   |                                                         | X                              | X                                              | X                            |

**Supplementary table 2 Collaboration study Center**

| Number | Study Centers                                               | Contact        |
|--------|-------------------------------------------------------------|----------------|
| 1.     | Beijing Tiantan Hospital                                    | Zhongrong Miao |
| 2.     | Changzhou No. 1 People's Hospital                           | Ya Peng        |
| 3.     | Zhangzhou City Hospital                                     | Wenhuo Chen    |
| 4.     | Chongqing sanxia central hospital                           | Shengli Chen   |
| 5.     | Liaocheng 3rd People's hospital                             | Cunfeng Song   |
| 6.     | The Fourth Affiliated Hospital of China Medical University  | Lianbo Gao     |
| 7.     | The First Affiliated Hospital of Jilin university           | Shouchun Wang  |
| 8.     | People's Hospital of Linyi City                             | Qiyi Zhu       |
| 9.     | Affiliated Hospital of Guiyang Medical College              | Hua Yang       |
| 10.    | Tieling City Hospital                                       | Deqiang Zhao   |
| 11.    | The third affiliated hospital of Guangxi medical university | Tong Li        |
| 12.    | Wuhan Central Hospital                                      | Ping Jing      |
| 13.    | Siping Central Hospital                                     | Junfeng Zhao   |
| 14.    | Luoyang Central Hospital affiliated to Zhengzhou university | Liping Wei     |
| 15.    | Langfang No. 4 People's Hospital                            | Liqiang Gui    |
| 16.    | Nanjing No. 1 Hospital                                      | Hongchao Shi   |
| 17.    | Wuchang Hospital of Wuhan City                              | Mingyi Tu      |
| 18.    | Baoan District Hospital of Shenzhen                         | Huawei Ye      |
| 19.    | Taizhou City Hospital                                       | Xiaohui Xu     |
| 20.    | Lanling County People's Hospital                            | Xie Feng       |
